# Supplementary material for: Complex Alterations of Fatty Acid Metabolism and Phospholipidome Uncovered in Isolated Colon Cancer Epithelial Cells
Source: MDPI journal article supplement (doi:10.3390/ijms22136650), 2021-06-22
Supplement: s1 [file s1]

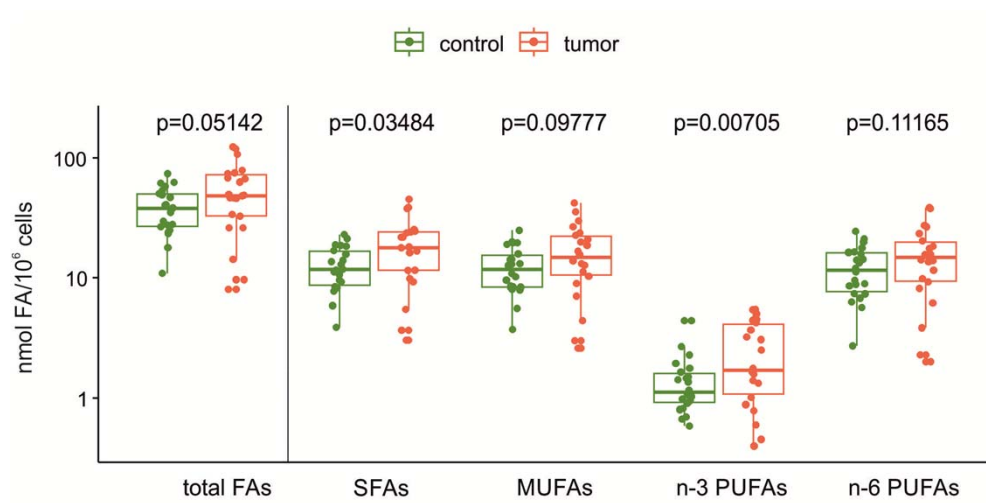

**Supplementary Figure S1.** Total amount of FAs and their particular classes detected in non-tumor (control) and tumor EpCAM+ cells were determined by GC/MS (n = 22). SFAs (saturated FAs), MUFAs (monounsaturated FAs), PUFAs (n-3, n-6 polyunsaturated FAs). Statistical significance (P-value) is indicated above each respective box plot pair.

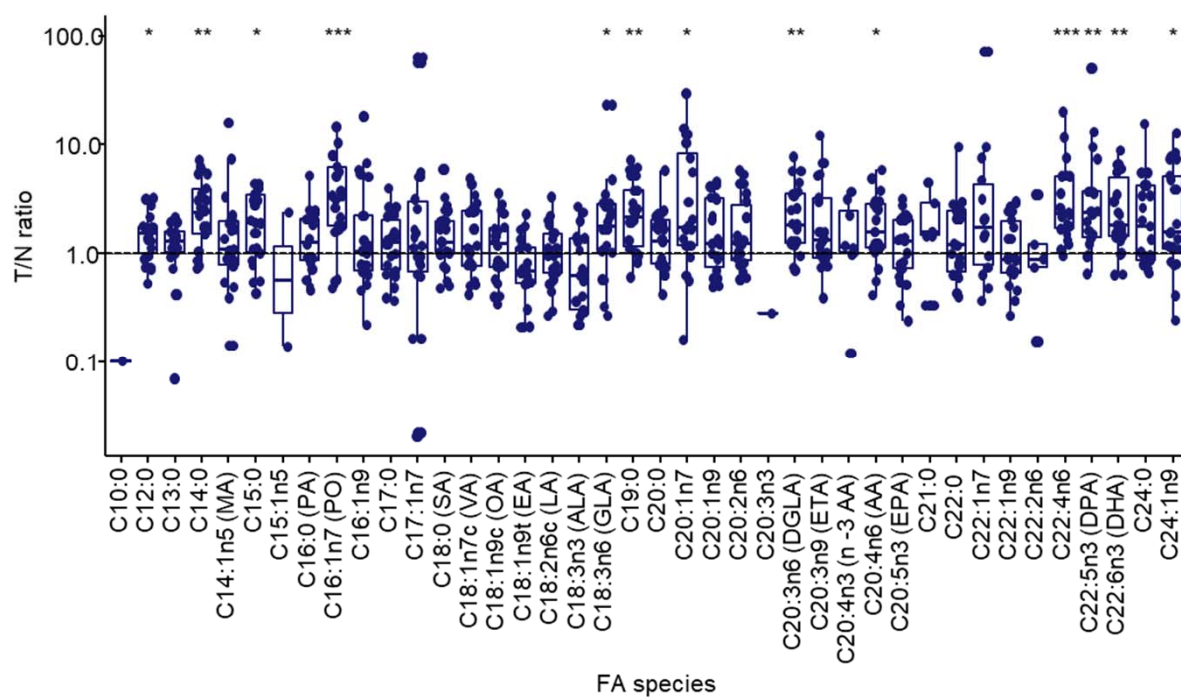

**Supplementary Figure S2.** Tumor/non-tumor (T/N) ratio of the amount of individual FAs detected in primary EpCAM<sup>+</sup> cells (tumor and non-tumor) isolated from colon cancer patients. Statistical significance is indicated above each box plot: \*  $P < 0.01$ , \*\*  $P < 0.001$ , \*\*\*  $P < 0.0001$

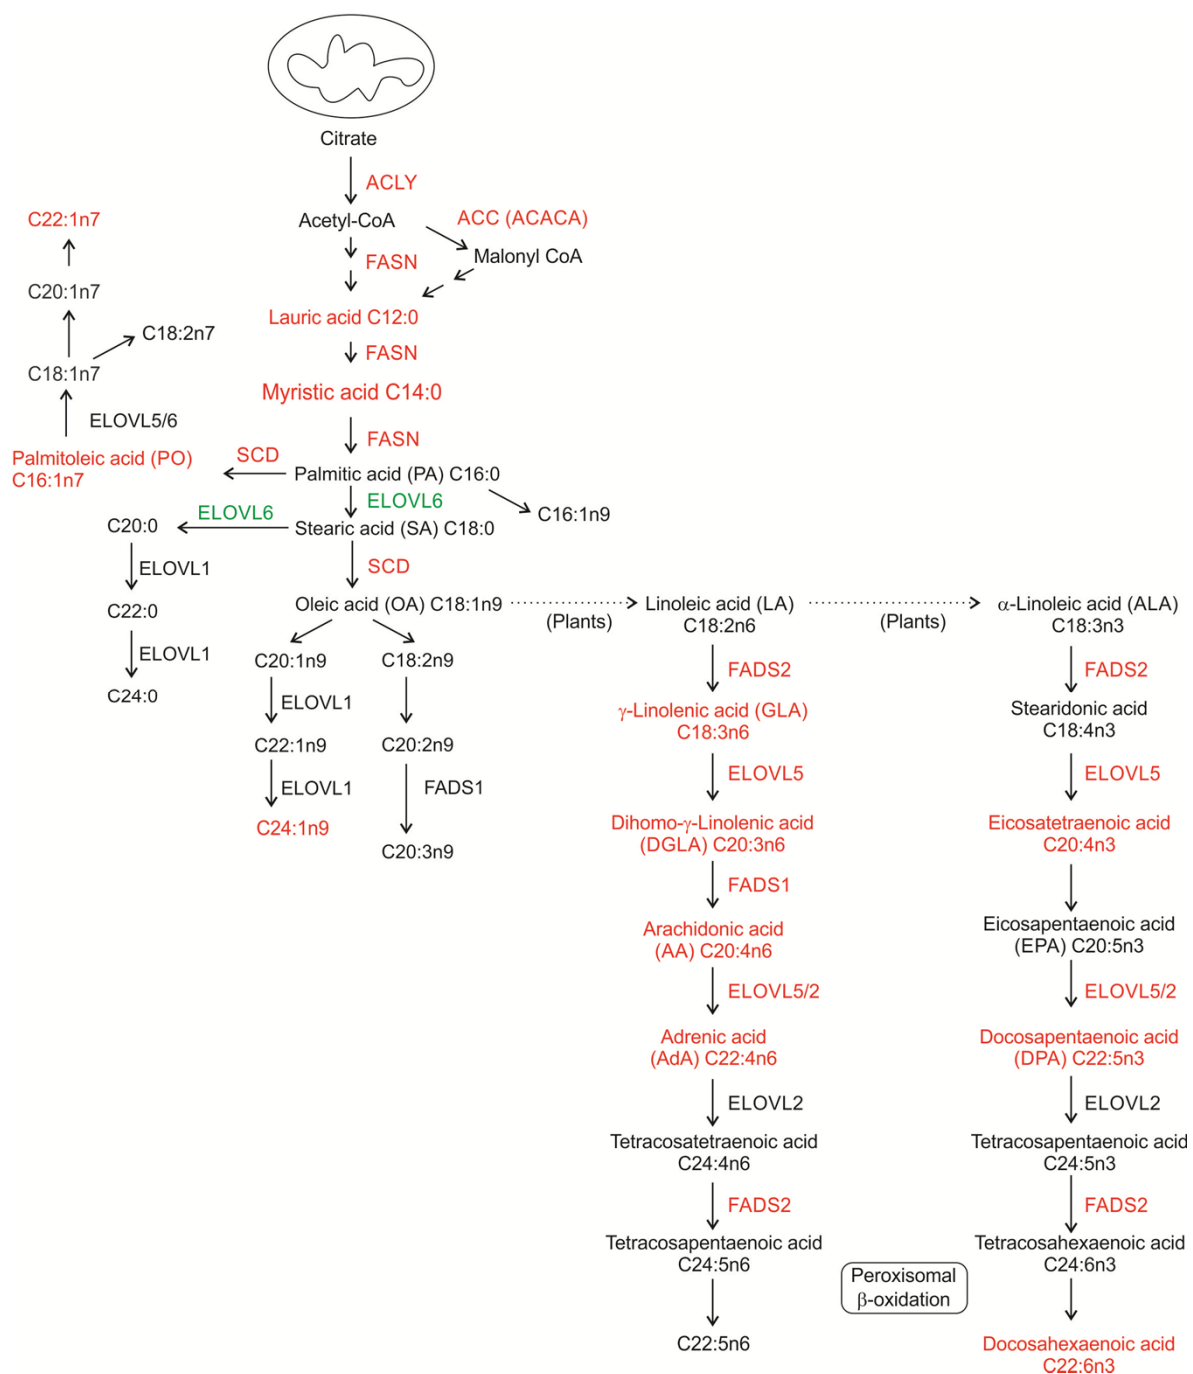

**Supplementary Figure S3.** A schematic presentation of FA metabolism. The scheme was prepared and modified according to Röhrig et Schultze, 2016 and Saini et Keum, 2018. Significantly up-regulated or down-regulated FAs and the genes encoding enzymes involved in FA synthesis, elongation and desaturation are indicated in red or green, respectively.

#### References:

- Röhrig, F., Schulze, A. The multifaceted roles of fatty acid synthesis in cancer. *Nat Rev Cancer* 16, 732–749 (2016).
- Saini, R.K., Keum, Y.-S. Omega-3 and omega-6 polyunsaturated fatty acids: Dietary sources, metabolism, and significance — A review. *Life Sci.* 203: 255-267 (2018).

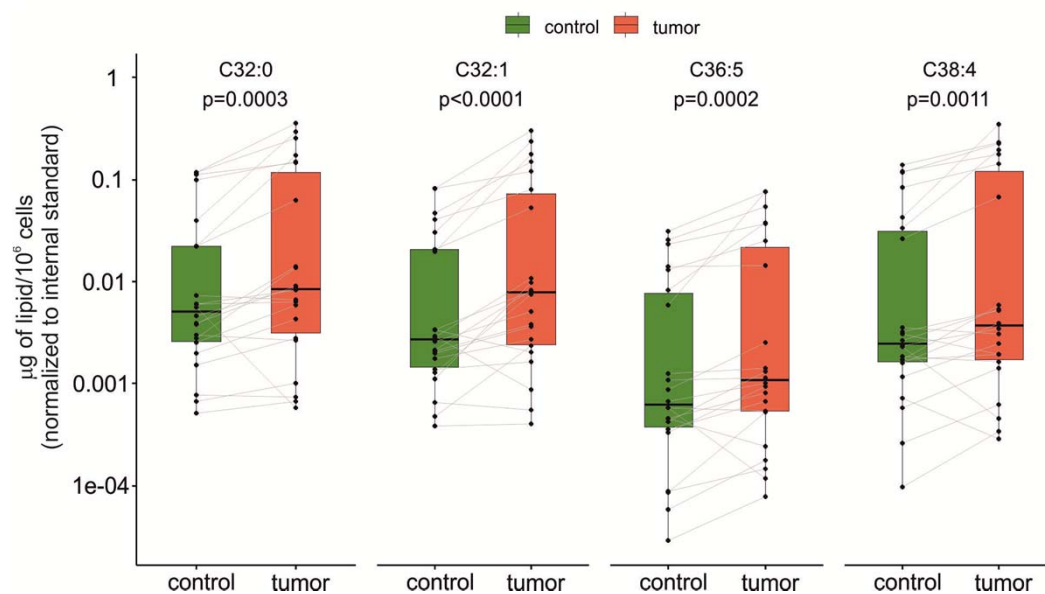

**Supplementary Figure S4.** PC species significantly increased in tumor cells vs. non-tumor (control) EpCAM<sup>+</sup> cells, determined by LC-MS/MS (n = 22). Values of PC content in non-tumor and corresponding tumor cells from the same patients are linked in pairwise graphs and the respective P-values are indicated above each pair of box plots, together with a number of C and double bonds.

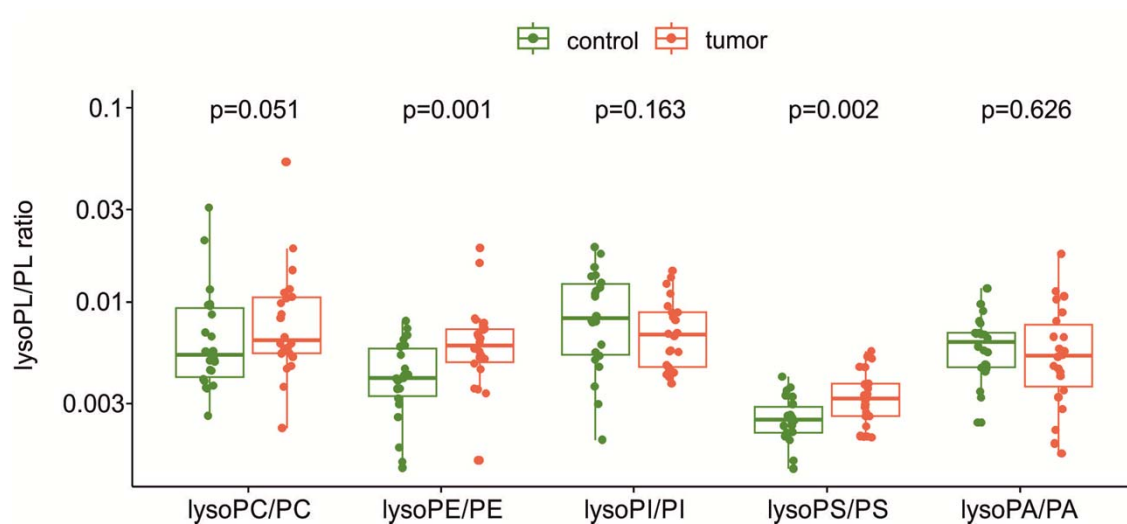

**Supplementary Figure S5.** Comparison of the lysoPL/PL ratio of individual classes in non-tumor (control) and tumor EpCAM+ cells (n = 22). PC, (lyso)phosphatidylcholine; PE, (lyso)phosphatidylethanolamine; PI, (lyso)phosphatidylinositol; PS, (lyso)phosphatidylserine; PA, (lyso)phosphatidic acid. Statistical significance (P-values) is indicated above each pair of box plots

**Supplementary Table S1.** Description of patient cohort (n = 22).

|                                      |  |                       |
|--------------------------------------|--|-----------------------|
| Gender                               |  |                       |
| Male                                 |  | 15 (68.2%)            |
| Female                               |  | 7 (31.8%)             |
| Age at diagnosis of CRC, years       |  |                       |
|                                      |  | 67.6 (59.8 - 76.1)    |
| BMI, kg/m2                           |  |                       |
|                                      |  | 25.1 (23 - 26.7)      |
| <=25                                 |  | 11 (50%)              |
| 25-30                                |  | 8 (36.4%)             |
| >30                                  |  | 3 (13.6%)             |
| Smoking status                       |  |                       |
| Current smoker                       |  | 4 (18.2%)             |
| Former smoker                        |  | 2 (9.1%)              |
| Non-smoker                           |  | 16 (72.7%)            |
| Alcohol use                          |  |                       |
| Regularly                            |  | 1 (4.5%)              |
| Occasionally                         |  | 17 (77.3%)            |
| Comorbidities                        |  |                       |
| Cardiovascular disease               |  | 11 (50%)              |
| Respiratory disease                  |  | 4 (18.2%)             |
| Diabetes mellitus                    |  | 4 (18.2%)             |
| Personal history                     |  |                       |
| Adenomatous polyps                   |  | 4 (18.2%)             |
| CRC                                  |  | 0 (0%)                |
| Non-specific intestinal inflammatory |  | 1 (4.5%)              |
| Other malignancy                     |  | 4 (18.2%)             |
| Family history                       |  |                       |
| Adenomatous polyps                   |  | 0 (0%)                |
| CRC                                  |  | 3 (13.6%)             |
| Glucose level, mmol/L                |  |                       |
|                                      |  | 5.3 (4.73 - 6.1)      |
| Cholesterol level, mmol/L            |  |                       |
|                                      |  | 4.73 (3.93 - 5.59)    |
| HDL, mmol/L                          |  |                       |
|                                      |  | 1.09 (0.86 - 1.26)    |
| LDL, mmol/L                          |  |                       |
|                                      |  | 2.94 (2.56 - 3.46)    |
| TAGs, mmol/L                         |  |                       |
|                                      |  | 1.31 (1.14 - 1.56)    |
| Albumin, g/L                         |  |                       |
|                                      |  | 36.65 (31.15 - 41.48) |
| Total protein, g/L                   |  |                       |
|                                      |  | 64.4 (58.27 - 71.7)   |
| Location of colon                    |  |                       |
| Descending                           |  | 4 (18.2%)             |
| Sigmoideum                           |  | 17 (77.3%)            |
| NA's                                 |  | 1 (4.5%)              |
| Grade                                |  |                       |
| G1                                   |  | 6 (27.3%)             |
| G2                                   |  | 13 (59.1%)            |
| G3                                   |  | 3 (13.6%)             |
| Stage                                |  |                       |
| I                                    |  | 4 (18.2%)             |
| IIA                                  |  | 8 (36.4%)             |
| IIB                                  |  | 1 (4.5%)              |
| IIIB                                 |  | 4 (18.2%)             |
| IIIC                                 |  | 1 (4.5%)              |
| IVA                                  |  | 2 (9.1%)              |
| IVB                                  |  | 2 (9.1%)              |

**Supplementary Table S2.** List of analyzed FAs.

| Shorthand designation | Abbreviation | Trivial Name                     | IUPAC Name                                            |
|-----------------------|--------------|----------------------------------|-------------------------------------------------------|
| C12:0                 |              | Lauric acid                      | Dodecanoic acid                                       |
| C13:0                 |              |                                  | Tridecanoic acid                                      |
| C14:0                 |              | Myristic acid                    | Tetradecanoic acid                                    |
| C14:1n5               | MA           | Myristoleic acid                 | <i>cis</i> -Tetradec-9-enoic acid                     |
| C15:0                 |              |                                  | Pentadecanoic acid                                    |
| C15:1n5               |              |                                  | <i>cis</i> -Pentadec-10-enoic acid                    |
| C16:0                 | PA           | Palmitic acid                    | Hexadecanoic acid                                     |
| C16:1n7               | PO           | Palmitoleic acid                 | <i>cis</i> -Hexadec-9-enoic acid                      |
| C16:1n9               |              |                                  | <i>cis</i> -Hexadec-7-enoic acid                      |
| C17:0                 |              | Margaric acid                    | Heptadecanoic acid                                    |
| C17:1n7               |              |                                  | <i>cis</i> -Heptadec-10-enoic acid                    |
| C18:0                 | SA           | Stearic acid                     | Octadecanoic acid                                     |
| C18:1n7c              | VA           | Vaccenic acid                    | <i>cis</i> -Octadec-7-enoic acid                      |
| C18:1n9c              | OA           | Oleic acid                       | <i>cis</i> -Octadec-9-enoic acid                      |
| C18:1n9t              |              | Elaidic acid                     | <i>trans</i> -Octadec-9-enoic acid                    |
| C18:2n6c              | LA           | Linoleic acid                    | <i>cis,cis</i> -Octadeca-9,12-dienoic acid            |
| C18:3n6               | GLA          | $\gamma$ -Linolenic acid         | <i>all-cis</i> -Octadeca-6,9,12-trienoic acid         |
| C18:3n3               | ALA          | $\alpha$ -Linolenic acid         | <i>all-cis</i> -Octadeca-9,12,15-trienoic acid        |
| C18:4n3               | STD          | Stearidonic acid                 | <i>all-cis</i> -Octadeca-6,9,12,15-tetraenoic acid    |
| C19:0                 |              |                                  | Nonadecanoic acid                                     |
| C20:0                 |              | Arachidic acid                   | Icosanoic acid                                        |
| C20:1n7               |              |                                  | <i>cis</i> -Icos-13-enoic acid                        |
| C20:1n9               |              | Gadoleic Acid                    | <i>cis</i> -Icos-11-enoic acid                        |
| C20:2n6               |              | Eicosadienoic acid               | <i>cis,cis</i> -Icosa-11,14-dienoic acid              |
| C20:3n6               | DGLA         | Dihomo- $\gamma$ -Linolenic acid | <i>all-cis</i> -Icosa-8,11,14-trienoic acid           |
| C20:3n3               | ETE          | Eicosatrienoic acid              | <i>all-cis</i> -Icosa-11,14,17-trienoic acid          |
| C20:3n9               |              |                                  | <i>all-cis</i> -Icosa-5,8,11-trienoic acid            |
| C20:4n6               | AA           | Arachidonic acid                 | <i>all-cis</i> -Icosa-5,8,11,14-tetraenoic acid       |
| C20:4n3               | ETA          | w-3 Arachidonic acid             | <i>all-cis</i> -Icosa-8,11,14,17-tetraenoic acid      |
| C20:5n3               | EPA          | Eicosapentaenoic acid            | <i>all-cis</i> -Icosa-5,8,11,14,17-pentaenoic acid    |
| C21:0                 |              |                                  | Heneicosanoic acid                                    |
| C22:0                 |              | Behenic acid                     | Docosanoic acid                                       |
| C22:1n7               |              |                                  | <i>cis</i> -Docos-15-enoic acid                       |
| C22:1n9               |              | Erucic acid                      | <i>cis</i> -Docos-13-enoic acid                       |
| C22:2n6               |              | Docosadienoic acid               | <i>cis,cis</i> -Docosa-13,16-dienoic acid             |
| C22:4n6               | AdA          | Adrenic Acid                     | <i>all-cis</i> -Docosa-7,10,13,16-tetraenoic acid     |
| C22:5n3               | DPA          | Docosapentaenoic acid            | <i>all-cis</i> -Docosa-7,10,13,16,19-pentaenoic acid  |
| C22:6n3               | DHA          | Docosahexaenoic acid             | <i>all-cis</i> -Docosa-4,7,10,13,16,19-hexaenoic acid |
| C24:0                 |              | Lignoceric acid                  | Tetracosanoic acid                                    |
| C24:1n9               |              | Nervonic acid                    | <i>cis</i> -Tetracos-15-enoic acid                    |

**Supplementary Table S3.** List of genes evaluated in individual qPCR assays.

**Real Time ready - Custom panel 96-24+ (Roche, ref.No.05582610001)**

| <b>Gene</b> | <b>NCBI Entrez<br/>Gene ID</b> |
|-------------|--------------------------------|
| ACLY        | 47                             |
| ACACA       | 31                             |
| FASN        | 2194                           |
| SCD         | 6319                           |
| PPARG       | 5468                           |
| SREBF1      | 6720                           |
| SCAP        | 22937                          |
| NACC1       | 112939                         |
| CD36        | 948                            |
| PLIN2       | 123                            |
| IPO8*       | 10526                          |

**TaqMan™ Gene Expression Assay (FAM) (Thermo Fisher Scientific, cat. No. 4331182)**

| <b>Gene</b> | <b>NCBI Entrez<br/>Gene ID</b> | <b>Assay ID</b> |
|-------------|--------------------------------|-----------------|
| ELOVL1      | 64834                          | Hs00967955_g1   |
| ELOVL2      | 54898                          | Hs00214936_m1   |
| ELOVL5      | 60481                          | Hs01094711_m1   |
| ELOVL6      | 79071                          | Hs00907564_m1   |
| FADS2       | 9415                           | Hs00927433      |
| IPO8*       | 10526                          | Hs00914057_m1   |

\* reference gene
